# Supplementary material
Source: PubMed Central journal article supplement (PMC3421200)
Supplement: 1204199109_pnas.201204199SI.pdf [file 1204199109_pnas.201204199SI.pdf]

# Supporting Information

Rajapaksa et al. 10.1073/pnas.1204199109

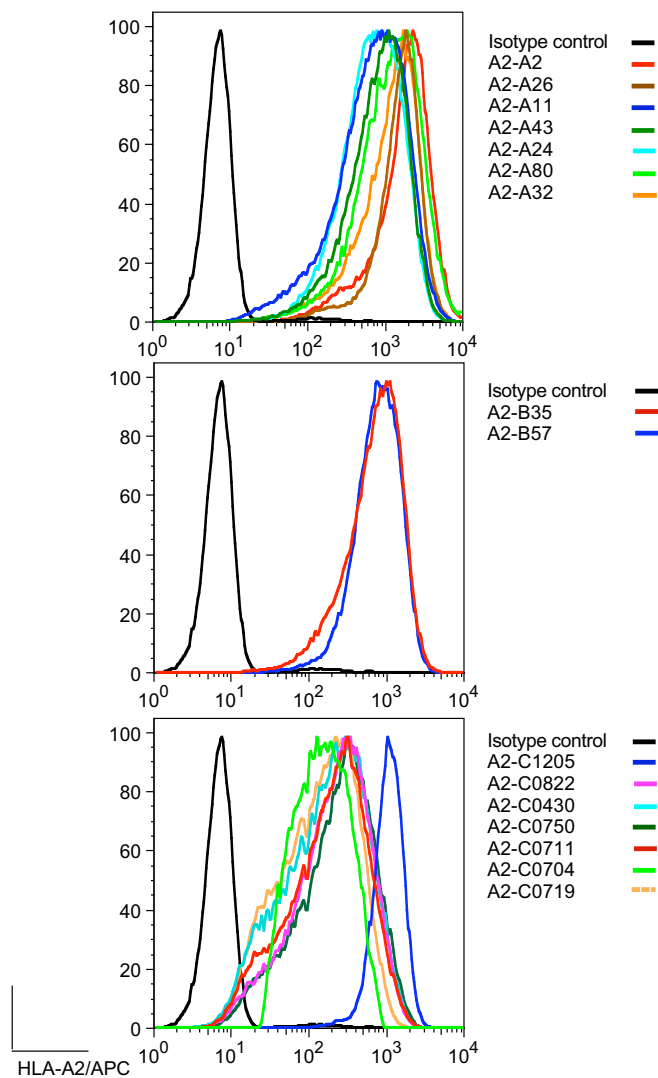

Fig. S1. Representative histograms demonstrating expression of HLA-A2-A, -B, and -C chimera on the surface of Jurkat cell lines.

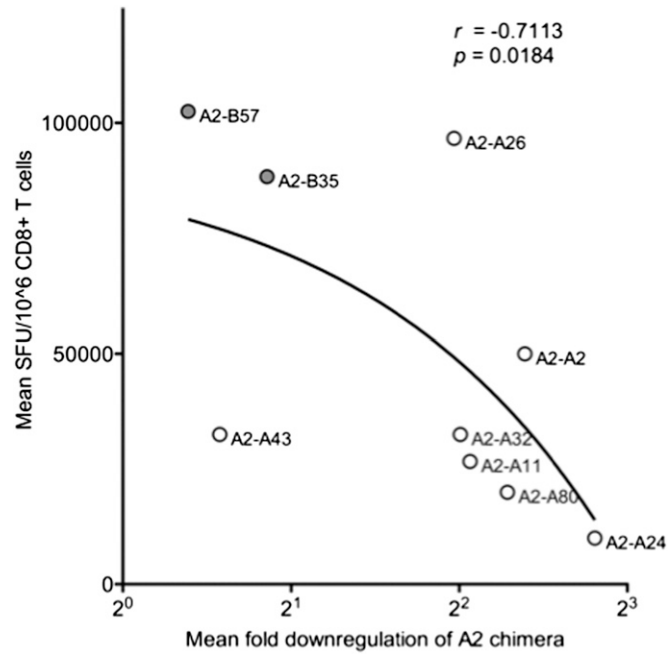

**Fig. S2.** Correlation between level of down-regulation of A2 chimera (HLA-A and HLA-B) of HIV-IIIB-infected cells and mean spot-forming units. All data are summary of three independent experiments.

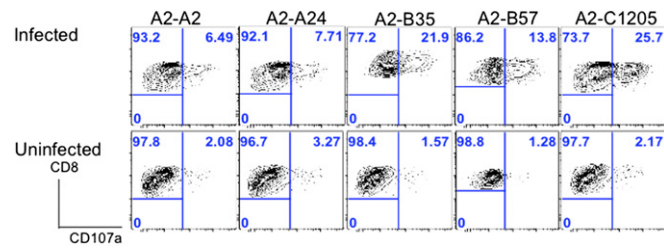

**Fig. S3.** Expression of CD107a was measured on the G10 cells cocultured with infected cells. All data are representative of three independent experiments.

**Table S1. Complete list of alleles shared cytoplasmic domain sequences**

| Allele name    | Known class-I alleles                                                                                                                                                                                                                                                                                                                                                                                                                                                                                                                                                                                   |
|----------------|---------------------------------------------------------------------------------------------------------------------------------------------------------------------------------------------------------------------------------------------------------------------------------------------------------------------------------------------------------------------------------------------------------------------------------------------------------------------------------------------------------------------------------------------------------------------------------------------------------|
| HLA-A A2-A2    | A*6901, A*6871, A*6836, A*6822, A*6817, A*6808, A*6803, A*6802, A*6801, A*1105, A*0289, A*0281, A*0279, A*0277, A*0268, A*0264, A*0260, A*0257, A*0251, A*0248, A*0233, A*0230, A*02279, A*02269, A*02266, A*02265, A*02264, A*02259, A*02253, A*02251, A*0224, A*02249, A*02230, A*0222, A*0218, A*0217, A*0216, A*0213, A*02124, A*0212, A*0211, A*0209, A*0210, A*0207, A*0206, A*0205, A*0204, A*0203, A*0202, A*0201                                                                                                                                                                               |
| HLA-A A2-A26   | A*2501, A*2502, A*2601, A*2602, A*2603, A*2604, A*2605, A*2607, A*2608, A*2615, A*2650, A*2901, A*2902, A*2903, A*3101, A*3104, A*3132, A*3146, A*3201, A*3202, A*3205, A*3217, A*3301, A*3303, A*3307, A*3349, A*3401, A*3402, A*4301, A*6601, A*6602, A*7401, A*7402, A*0265                                                                                                                                                                                                                                                                                                                          |
| HLA-A A2-A11   | A*3601, A*3025, A*3008, A*3004, A*3002, A*3001, A*1177, A*1175, A*1174, A*1162, A*1161, A*1160, A*1156, A*1150Q, A*1125, A*1112, A*1110, A*1107, A*1104, A*1103, A*1102, A*1101, A*0378, A*0377, A*0339, A*0326, A*03134, A*0304, A*0302, A*0301, A*0120, A*0125, A*0114, A*0109, A*0103, A*0102, A*0101                                                                                                                                                                                                                                                                                                |
| HLA-A A2-A43   | Aw*43                                                                                                                                                                                                                                                                                                                                                                                                                                                                                                                                                                                                   |
| HLA-A A2-A24   | A*2461, A*2422, A*2420, A*24152, A*24143, A*24142, A*24129, A*24128, A*2410, A*2408, A*2407, A*2404, A*2403, A*2402, A*2326, A*2309, A*2306, A*2301                                                                                                                                                                                                                                                                                                                                                                                                                                                     |
| HLA-A A2-A80   | A*8001                                                                                                                                                                                                                                                                                                                                                                                                                                                                                                                                                                                                  |
| HLA-A A2-A32   | A*32                                                                                                                                                                                                                                                                                                                                                                                                                                                                                                                                                                                                    |
| HLA-B A2-B35   | B*1402, B*49, B*15, B*15/41, B*1501, B*15011, B*1501101, B*1502, B*1504, B*1508, B*1510new, B*1511, B*1512, B*1513, B*1514, B*1515, B*1516, B*1517, HLA-B*15170101, B*1518, HLA-B*1525, B*1519, B*1520, B*1521, B*1522, B*1523, B*1542, B*1554, B*1801, B*3502, B*3515, B*3511, B*3512, B*3541, B*3565Q, B*38new, B*390101, B*39011, B*3906v, B*3913v, B*510111, B*510113, B*510114, 510115, B*510116, B*51022, B*5104, B*5108, B*5301, B*53v, HLA-B*5401, B*5501, B*14, B*15, B*18, B*3801, B*35, B*38, B*51, B*51-cd3.3, B*73, B7301, Bw46, Bw58, Bw65, Bw72, Bw78                                    |
| HLA-B A2-B57   | B*07, B*27, B*4002, B*57, B*8101, B*0703, B*0705, B*07021, B*07021, B*0706, B*0707, B*0750, B*07ne, B*07xx 362, B*1301, B*1302, B*130203, B*27052 B*2706, B*2711, B*2732, B*3701, B*3702, B*4007 B*4201, B*4202, B*4208, B*44, B*44021, B*4403, B*4407, B*4805, B*5701 B*5706, B*5711, B*8101, B*0701, B*0703, B*0704, B*0802, B*13, B*44.2, B*44BO, B*4803, Bw41, Bw42, Bw62, B*44new                                                                                                                                                                                                                  |
| HLA-C A2-C1205 | C*0346, C*1802, C*1801, C*1604, C*1602, C*1601, C*1517, C*1516, C*1513, C*1505, C*1504, C*1503, C*1502, C*1436, C*1423, C*1403, C*1222, C*1219, C*1213, C*1208, C*1205, C*1204, C*1203, C*1202, C*0841, C*0840, C*0831, C*0827, C*0825, C*0824, C*0821, C*0820, C*0804, C*0803, C*0802, C*0801, C*0624, C*0602, C*0509, C*0508, C*0503, C*0501, C*0471, C*0470, C*0442, C*0406, C*0403, C*0401, C*0361, C*0340, C*0313, C*03100, C*0306, C*0305, C*0304, C*0303, C*0302, C*0223, C*0221, C*0220, C*0216, C*0211, C*0210, C*0202, C*0140, C*0130, C*0121, C*0114, C*0108, C*0106, C*0104, C*0103, C*0102 |
| HLA-C A2-C0822 | C*0822                                                                                                                                                                                                                                                                                                                                                                                                                                                                                                                                                                                                  |
| HLA-C A2-C0430 | C*0430                                                                                                                                                                                                                                                                                                                                                                                                                                                                                                                                                                                                  |
| HLA-C A2-C0750 | C*0750                                                                                                                                                                                                                                                                                                                                                                                                                                                                                                                                                                                                  |
| HLA-C A2-C0711 | C*0711                                                                                                                                                                                                                                                                                                                                                                                                                                                                                                                                                                                                  |
| HLA-C A2-C0704 | C*0767, C*0766, C*0757, C*0756, C*0749, C*0742, C*0736, C*0730, C*0729, C*0726, C*07172, C*07170, C*07149, C*0704, C*0702, C*0701, C*07235, C*0704, C*0702, C*0701, C*0752, C*0793, C*0759, C*0746, C*07208                                                                                                                                                                                                                                                                                                                                                                                             |
| HLA-C A2-C0719 | C*0719, C*0718, C*0706                                                                                                                                                                                                                                                                                                                                                                                                                                                                                                                                                                                  |

**Table S2. List of primers used to make the HLA class-I alleles**

| Primer name | Sequence                                                                                                                                      |
|-------------|-----------------------------------------------------------------------------------------------------------------------------------------------|
| A2F2Bam     | ACG <u>GGA TCC</u> ACC ACC ATG GCC GTC ATG GCG CCC CGA                                                                                        |
| A2R2Not     | ATA GTT TAG <u>CGG CCG CTC</u> ACA CTT TAC AAG CTG TGA GAG ACA CAT CAG A                                                                      |
| A2M1RNot    | ATA GTT TAG <u>CGG CCG CTC</u> ACA CTT TAC AAG CTG TGA GAG ACA <u>TAT</u> CAG A                                                               |
| A2M2RNot    | ATA GTT TAG <u>CGG CCG CTC</u> ACA CTT TAC AAG CTG TGA GAG ACA CAT AGC CCT GAG <u>CTC</u> TGT CAC T                                           |
| A2M3RNot    | ATA GTT TAG <u>CGG CCG CTC</u> ACA CTT TAC AAG CTG TGA GAG ACA CAT CAG AGC CCT GGG CAC TGT CAC TGC TTG<br>CAG CCT GAG <u>TGT</u> AAC T        |
| A2M4RNot    | ATA GTT TAG <u>CGG CCG CTC</u> ACA CTT TAC AAG CTG TGA GAG ACA <u>TAT</u> CAG AGC CCT GGG CAC TGT CAC TGC TTG CAG<br>CCT <u>GAA</u> AGT AGC T |
| A2M5R       | TGT GAG AGA CAC ATC AGA GCC CTG GGC ACT GTC ACT GCT TGC AGC CTG AGA GTA GCT CCC TCC TTT TCT ATC TGA<br>GCT <u>GTT</u> CCT CCT                 |
| A2M6R       | TGT GAG AGA CAC ATC AGA GCC CTG GGC ACT GTC ACT GCT TGC AGC CTG                                                                               |
| A2R         | T CCA CAT CAC AGC AGC GAC CAC                                                                                                                 |
| B57F        | T GTG GTC GCT GCT GTG ATG TGG AGG AGG AAG AGC TCA <b>GGT GGA</b> AAA GG                                                                       |
| B57NotR     | ATA GTT TAG <u>CGG CCG CTC</u> A AGC TGT GAG AGA CAC ATC AGA GCC CTG GGC ACT GTC GCT <b>GCA</b> CGC AGC                                       |
| B35NotR     | ATA GTT TAG <u>CGG CCG CTC</u> A AGC TGT GAG AGA CAC ATC AGA GCC CTG GGC ACT GTC GCT <b>GGA</b> CGC AGC                                       |
| CwR1        | GCT GGA CGC AGC CTG AGA GCA GCT CCC TCC TTT TCC ACC TGA GCT CTT CCT CCT   <b>CCA CAT CAC AGC AGC GAC CAC</b>                                  |
| CwR2Not     | TCG ATG CGG CCG <b>CTC</b> <b>AGG</b> CTT TAC AAG CGA TGA GAG ACT CAT CAG AGC CCT GGG CAC TGT <b>TGC TGG ACG CAG CCT</b><br><b>GAG AGC</b>    |
| CwR1        | AGC TCC CTC CTT TTC CAC CTG                                                                                                                   |
| CwF1        | CAG GTG GAA AAG GAG GGA GCT <b>ACT</b> CTC AGG CTG CGT CCA GC                                                                                 |
| CwR2        | TGG ACG CAG CCT GAG AGC AG                                                                                                                    |
| CwF2        | CTG CTC TCA GGC TGC GTC <b>CAC</b> CAA CAG TGC CCA GGG CTC TG                                                                                 |
| CwR3        | TCG ATG CGG CCG CTC AGG CTT TAC AAG <b>TGA</b> TGA G                                                                                          |
| CwR4        | ACG CAG CCT GAG AGC AGC TC                                                                                                                    |
| CwF4        | GAG CTG CTC TCA GGC TGC <b>GTG</b> CAG CAA CAG TGC CCA GGG C                                                                                  |
| CwR6        | ACG <b>CAA</b> CCT GAG AGC AGC TC                                                                                                             |
| UR7         | TCG ATG CGG CCG CTC A GGC TTT ACA AGC GAT GAG AGA CTC ATC AGA GCC CTG GGC ACT GTT G                                                           |

Restriction sites and point mutations are indicated by underline and boldface.

**Table S3. HLA-I cytoplasmic tail isoforms and primers used to generate each corresponding HLA-A2 construct**

| Allele name | Primers used                        |
|-------------|-------------------------------------|
| A2-A2       | A2F2Bam/A2R2Not                     |
| A2-A26      | A2F2Bam/A2M1RNot                    |
| A2-A11      | A2F2Bam/A2M3RNot                    |
| A2-A43      | A2F2Bam/A2M4RNot                    |
| A2-A24      | A2F2Bam/A2M5→A2F2Bam/A2R2Not        |
| A2-A80      | A2F2Bam/A2M6→A2F2Bam/A2R2Not        |
| A2-A32      | A2F2Bam/A2M7→A2F2Bam/A2R2Not        |
| A2-B35      | B57F/B57NotR→A2F2Bam/ B57NotR       |
| A2-B57      | B57F/B35NotR→A2F2Bam/B35NotR        |
| A2-C1205    | CwR1/Cw2Not→A2F2Bam/A2R             |
| A2-C0822    | A2F2Bam/CwR1→CwF2/UR7→A2F2Bam/UR7   |
| A2-C0430    | A2F2Bam/CwR2→CwF2/UR7→A2F2Bam/UR7   |
| A2-C0750    | A2F2Bam/CwR3                        |
| A2-C0711    | A2F2Bam/CwR4→CwF4/UR7→A2F2Bam/UR7   |
| A2-C0704    | A2F2Bam/CwR4→CwF4/CwR3→A2F2Bam/CwR3 |
| A2-C0719    | A2F2Bam/CwR6→CwF4/CwR3→A2F2Bam/CwR3 |

**Table S4. Mean fluorescence intensity and spot-forming unit values used for Fig. 2B**

|          | Mean fluorescent intensity<br>of HLA-A2 chimera | SFU/10 <sup>-6</sup> CTL clones |         |         |
|----------|-------------------------------------------------|---------------------------------|---------|---------|
|          |                                                 | Exp 1                           | Exp 2   | Exp 3   |
| A2-A2    | 1,083.00                                        | 57,500                          | 55,000  | 37,500  |
| A2-A26   | 1,158.00                                        | 105,000                         | 115,000 | 70,000  |
| A2-A11   | 1,097.00                                        | 27,500                          | 30,000  | 22,500  |
| A2-A43   | 647.00                                          | 37,500                          | 27,500  | 32,500  |
| A2-A24   | 1,056.00                                        | 15,000                          | 12,500  | 2,500   |
| A2-A80   | 835.00                                          | 20,000                          | 20,000  | 20,000  |
| A2-A32   | 646.00                                          | 32,500                          | 27,500  | 37,500  |
| A2-B35   | 931.00                                          | 167,500                         | 62,500  | 35,000  |
| A2-B57   | 1,254.00                                        | 110,000                         | 80,000  | 117,500 |
| A2-C1205 | 1,161.00                                        | 50,000                          | 67,500  | 62,500  |
| A2-C0822 | 484.00                                          | 7,500                           | 5,000   | —       |
| A2-C0430 | 564.00                                          | 17,500                          | 7,500   | 12,500  |
| A2-C0750 | 501.00                                          | 5,000                           | 7,500   | 2,500   |
| A2-C0711 | 428.00                                          | 17,500                          | 20,000  | —       |
| A2-C0704 | 222.00                                          | 10,000                          | 10,000  | 5,000   |
| A2-C0719 | 392.00                                          | 7,500                           | 12,500  | 10,000  |

Data used for generation of Fig. 2B. Mean fluorescent intensity of A2 chimera as determined (on day 6 of infection) of IIB-infected cells before carrying out the live virus ELISPOT assay as described in methods. Representative data of an experiment that was carried out three times.
